# Supplementary material for: Enhancement of amino acid production and secretion by Lactococcus lactis using a droplet-based biosensing and selection system
Source: PubMed Central journal article supplement — Metab Eng Commun. 2020 Jun 4;11:e00133. doi: 10.1016/j.mec.2020.e00133 (PMC7292884; doi:10.1016/j.mec.2020.e00133), 2020-06-04
Supplement: mmc2.pdf [file mmc2.pdf]

**Enhancement of amino acid production and secretion by  
*Lactococcus lactis* using a droplet-based biosensing and  
selection system**

Hernandez-Valdes *et al.*

## Supplementary Material

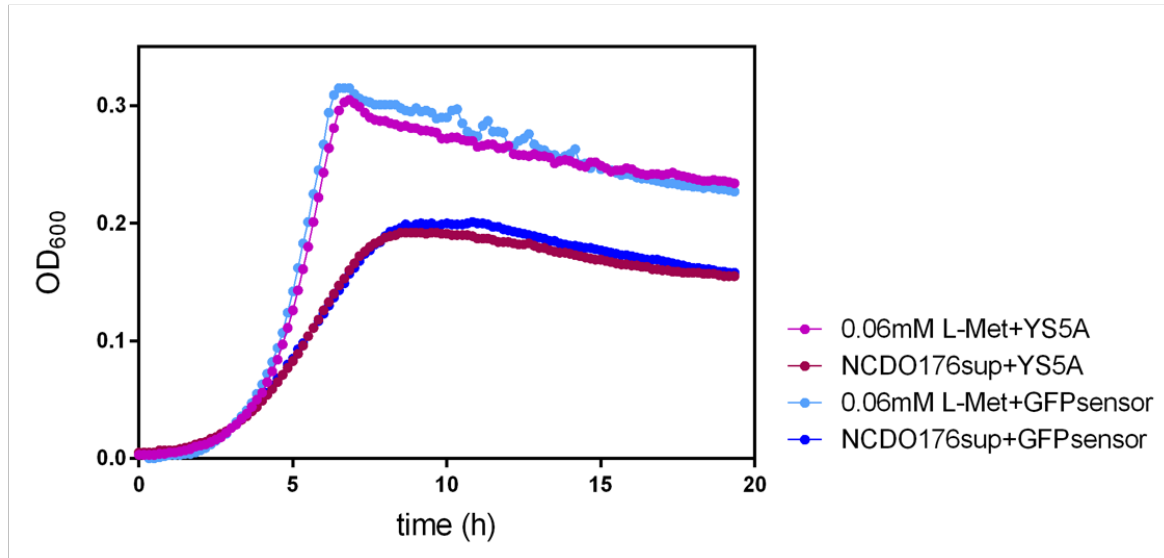

**Fig. S1. The GFPsensor and YS5A strains show similar growth to assess amino acid secretion.** The oligopeptide transport system in *L. lactis* consists of Opp, DtpT and Dpp. The strain GFPsensor is a deletion mutant of *opp* and *dtpT*, whereas YS5A is a deletion mutant of *opp*, *dtpT*, *dpp*. Previous studies in *L. lactis* MG1363 have reported that the *dppP* gene is not functional because of a nonsense mutation and a frameshift (Doeven et al., 2005). Therefore the *dpp* does not play a role in the peptide transport in the MG1363 strain. Both strains were tested for their capacity to grow in CDM-casein supplemented with a bacterial supernatant containing essential amino acids (NCDO176sup; dark blue and dark pink), and in a growth medium where the essential amino acid methionine was removed (CDM-met) and supplemented with methionine at a concentration of 0.06 mM (light blue, and light pink). Both strains show similar growth rate and identical cell density ( $OD_{600}$ ) in each growth condition. Thus, the GFPsensor that lacks two peptide transport systems is suitable as sensor cell.

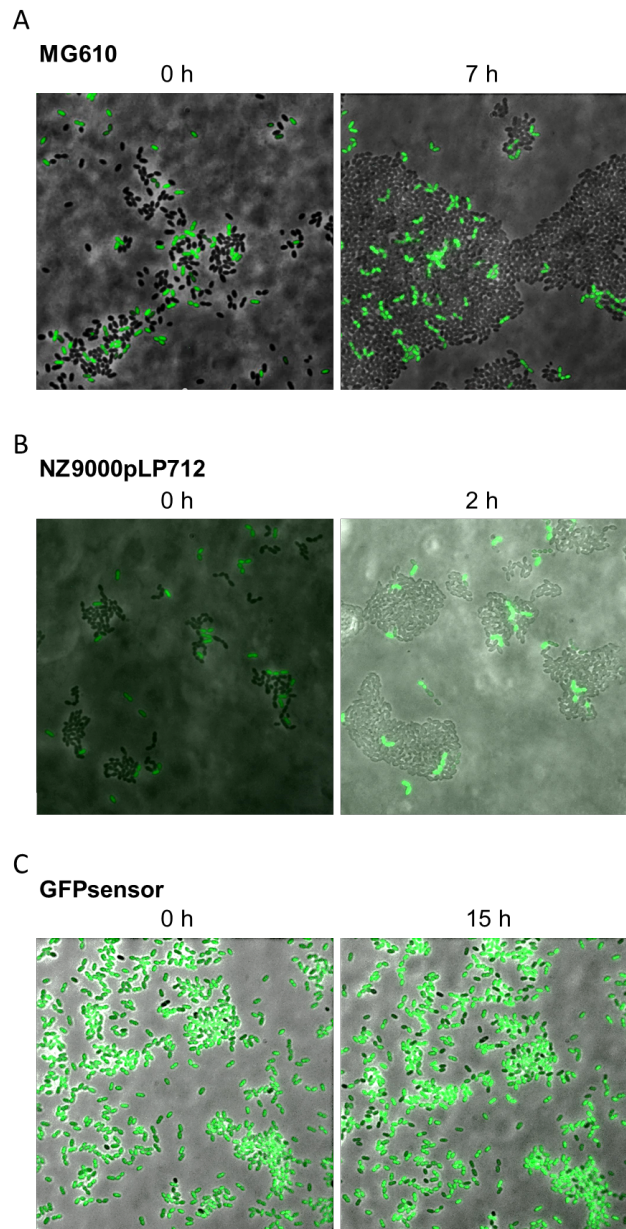

**Fig. S2. The GFPsensor is unable to grow in co-cultivation with the PrtP+ strains MG610 and NZ900pLP712.** Snapshots of time-lapse experiments of the GFPsensor on CDM-casein show no growth of this strain. (A) Co-cultivation of GFPsensor and MG610 in CDM-casein, the GFPsensor cells are unable to grow after incubation (right image). (B) Co-cultivation of NZ900pLP712 and GFPsensor on CDM-casein shows casein precipitation (formation of opaque and white layer), but the GFPsensor cells are also unable to grow. (C) Control sample of non-growing GFPsensor cells. Overlays of fluorescence-channel and bright-field are shown.

### Samples

1. MG1363
2. SK11
3. MG1363 pGKV552
4. RR2
5. WW4
6. M18
7. CNR2190
8. 1816S
9. CRL264
10. C17
11. NCDO176
12. IPLA838
13. MR3-T7
14. WG2
15. IL1403
16. MG1363 PNZ521
17. IL1403 pGKV552
18. AM1
19. IL594
20. NCDO712
21. SK11

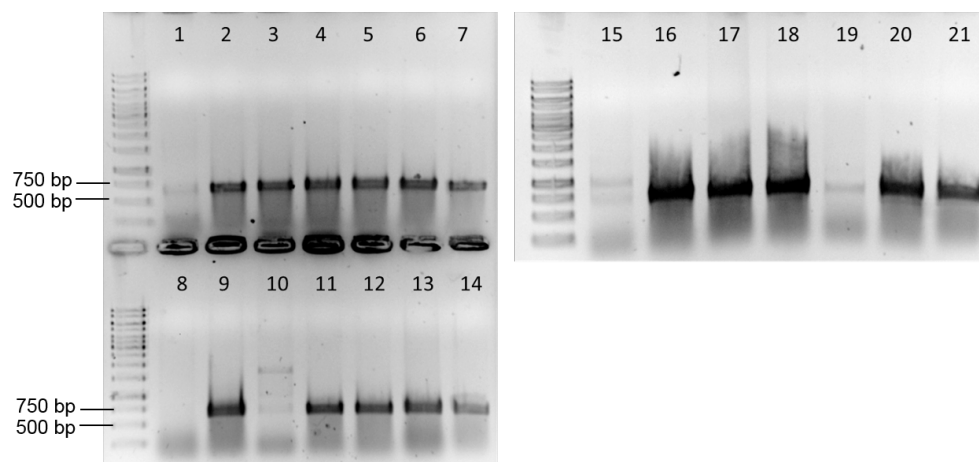

**Fig. S3. Confirmation of the presence of *prtP* gene in *L. lactis* strains by PCR.**

The presence of the proteinase gene *prtP* was confirmed by PCR amplification, using the primers TestPrtP\_Fw1 and TestPrtP\_Rv1, which amplify a fragment of 604 bp. Samples indicated in red are PrtP negative (PrtP-), some of them such as the laboratory strains MG1363 and IL1403 were added as negative control.

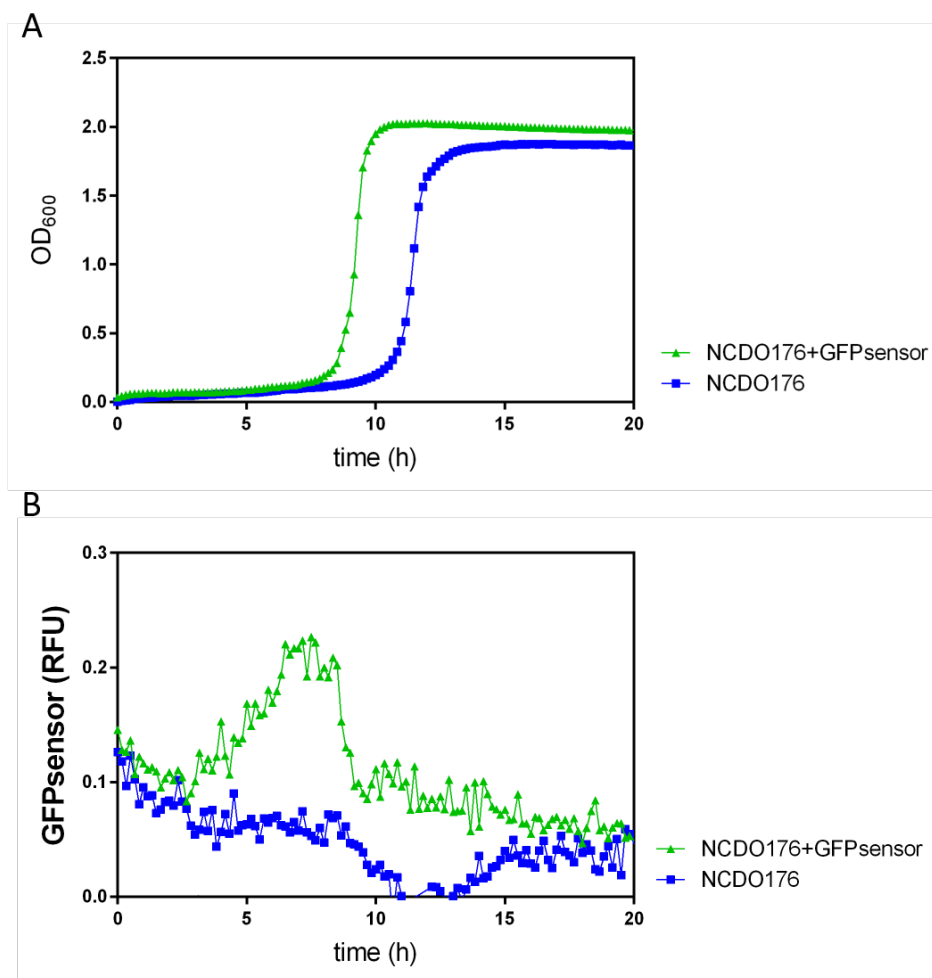

**Fig. S4. Plate reader assay for GFPsensor signal measurements obtained by co-cultivation of producer strains with GFPsensor strain.** (A) Growth curve of NCDO176 strain, as a single culture (blue line) and in co-cultivation with GFPsensor (green line), in a ratio 1:10 (producer:sensor). (B) Fluorescence measurements obtained by plate reader assay with both samples described in (A), where a clear fluorescence peak is observed when the GFPsensor grows (in this strain GFP is constitutively expressed). The maximum value of the fluorescence peak is considered as GFPsensor signal in all figures of this work and corrected by the correspondent optical density (OD<sub>600</sub>), yielding the relative fluorescent values (RFU/OD<sub>600</sub>). All values are corrected for background fluorescence.

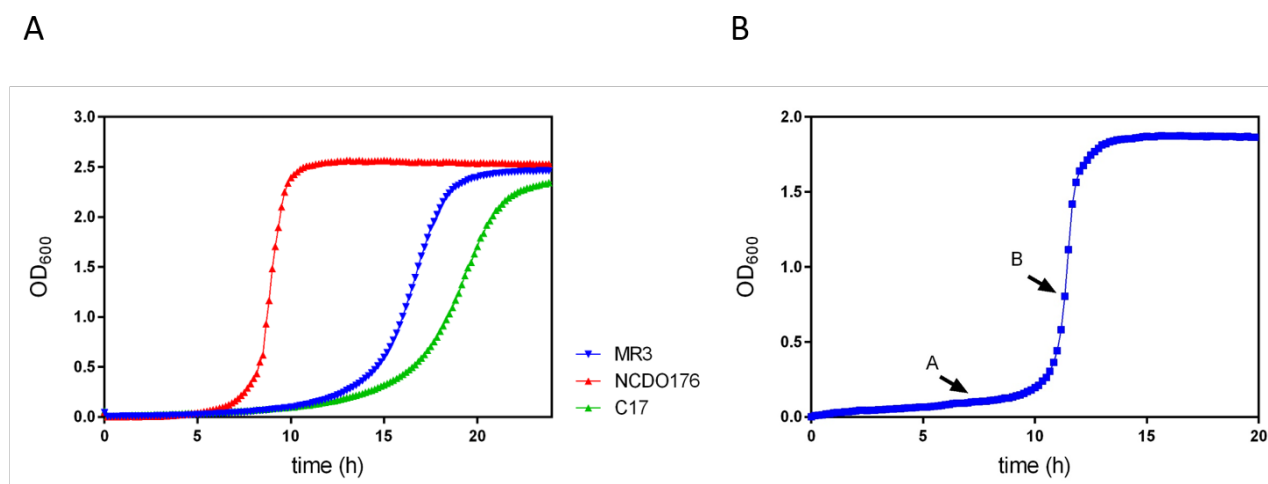

**Fig. S5. The growth of some producer strains of the collection used for screening of *Lactococcus lactis* subsp. *lactis* biovar. *diacetylactis*.** (A)

Although all the strains are inoculated with the same dilution and OD<sub>600</sub> (see Methods), they differ in growth rate. This fact could be explained by different factors, some of them could be related to nitrogen metabolism such as differences in proteolysis rate, in the PrtP type or in the casein-derived peptide uptake systems. Importantly, this observation might explain the difference of time in the time-lapse experiments where the maximum growth of the GFPsensor strain is reported. (B) Collection of supernatant samples. Supernatant samples of the producer strains grown in CDM-casein were taken at two different growth points. The arrows indicate the two sampling points: A-end of lag-phase, corresponding to the time of the maximum GFP expression observed when co-cultivated with the GFPsensor, and B-mid exponential phase, as an indication of accumulated secreted amino acids, and to avoid amino acids released due to cell lysis that might occur at the stationary growth phase.

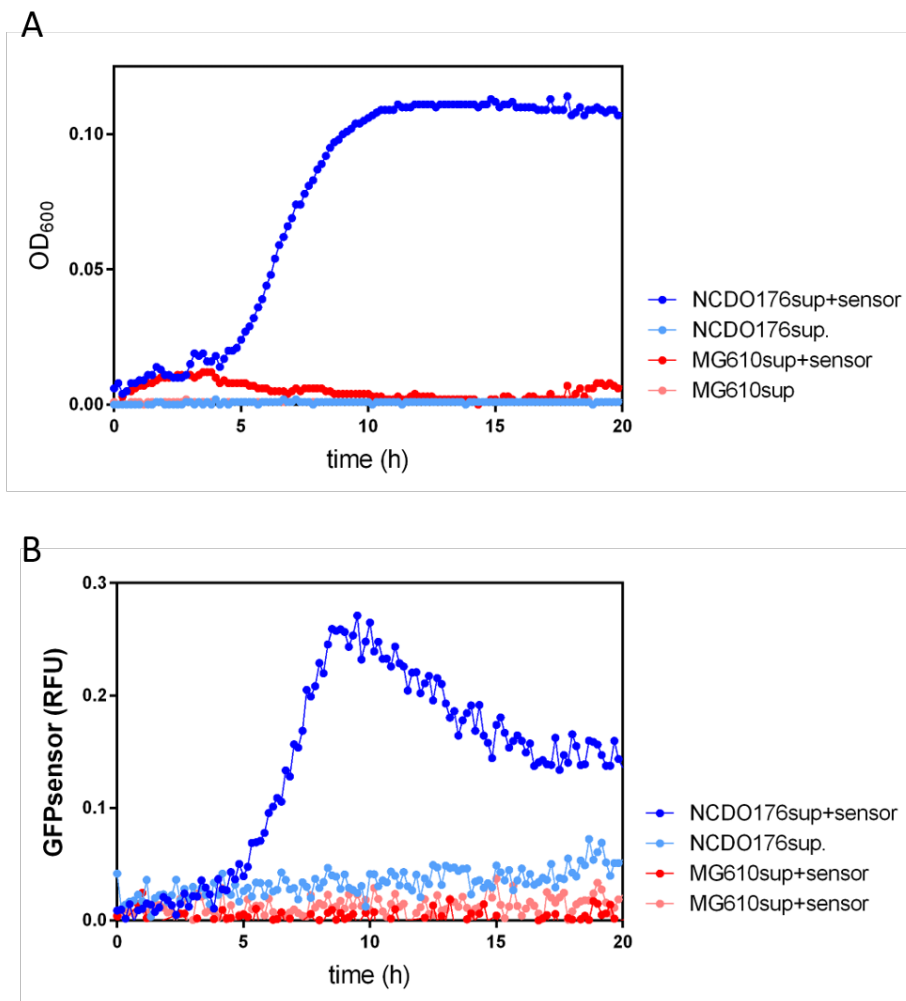

**Fig. S6. The supernatant of the amino acid producers contain free essential amino acids.** (A) Growth curve of the GFPsensor in the presence of supernatants of an amino acid producer (NCDO176, dark blue), and a non-producer (MG610, dark red). As controls, in light blue and light red lines, the supernatants without sensor cells. (B) GFP signal of the samples described in (A), shows that the GFPsensor is able to grow in the presence of only the supernatant of the amino acid producer (NCDO176).

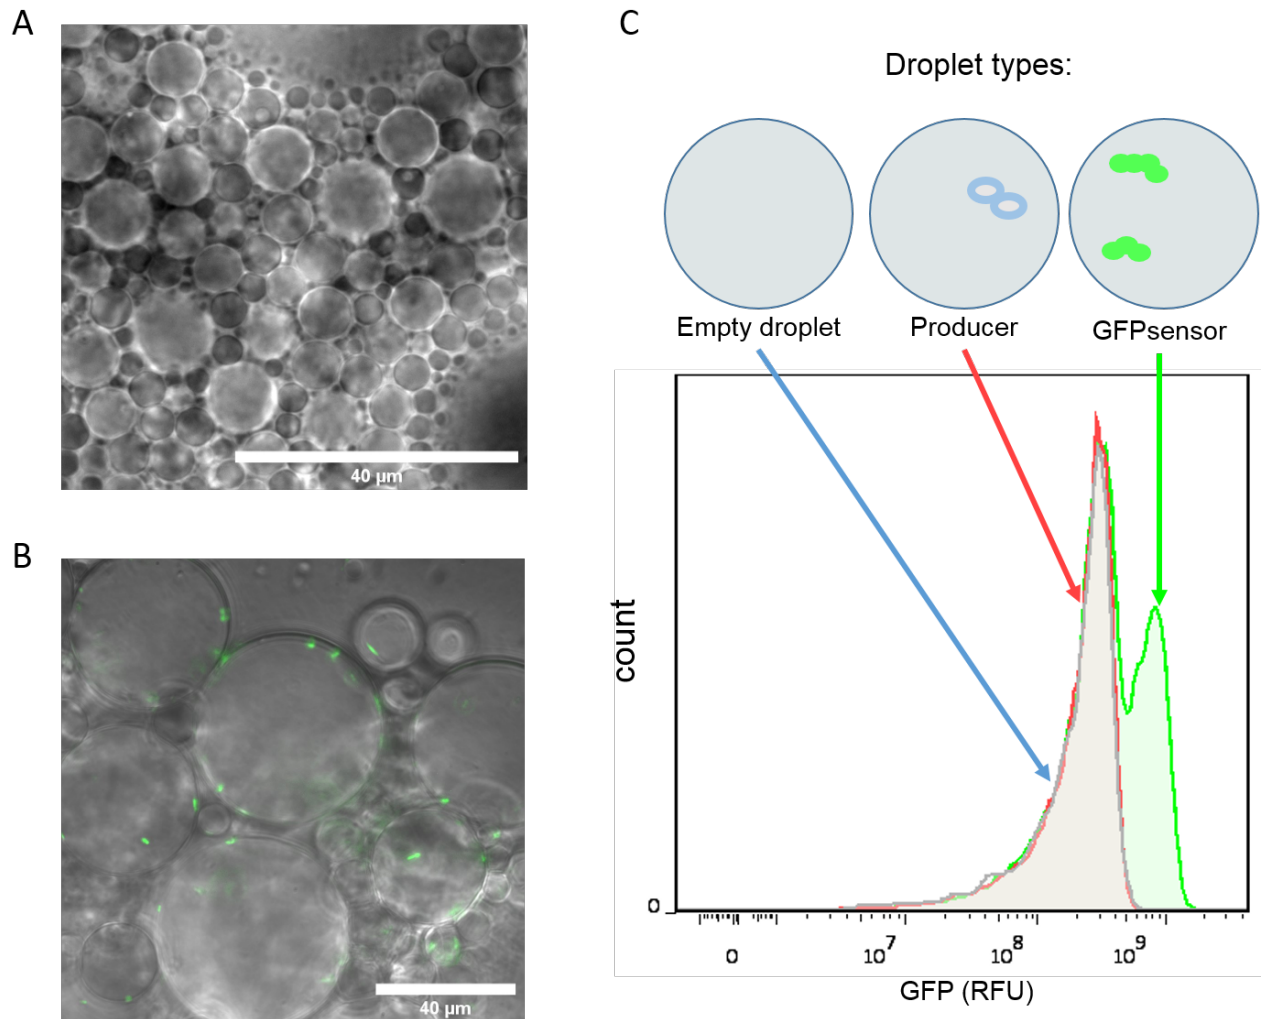

**Fig. S7. Production of agarose-based droplets.** (A) The high-performance dispersing instrument (Ultra Turrax type T25 Basic) creates droplets with a wide range of sizes. (B) GFPsensor cells are encapsulated in the droplets and observed with fluorescence microscopy. (C) In an experiment using CDM+aa (all amino acids present), the agarose-based droplets with grown cells GFPsensor are distinguished from empty droplets and droplets that contain only producer cells (GFP-).



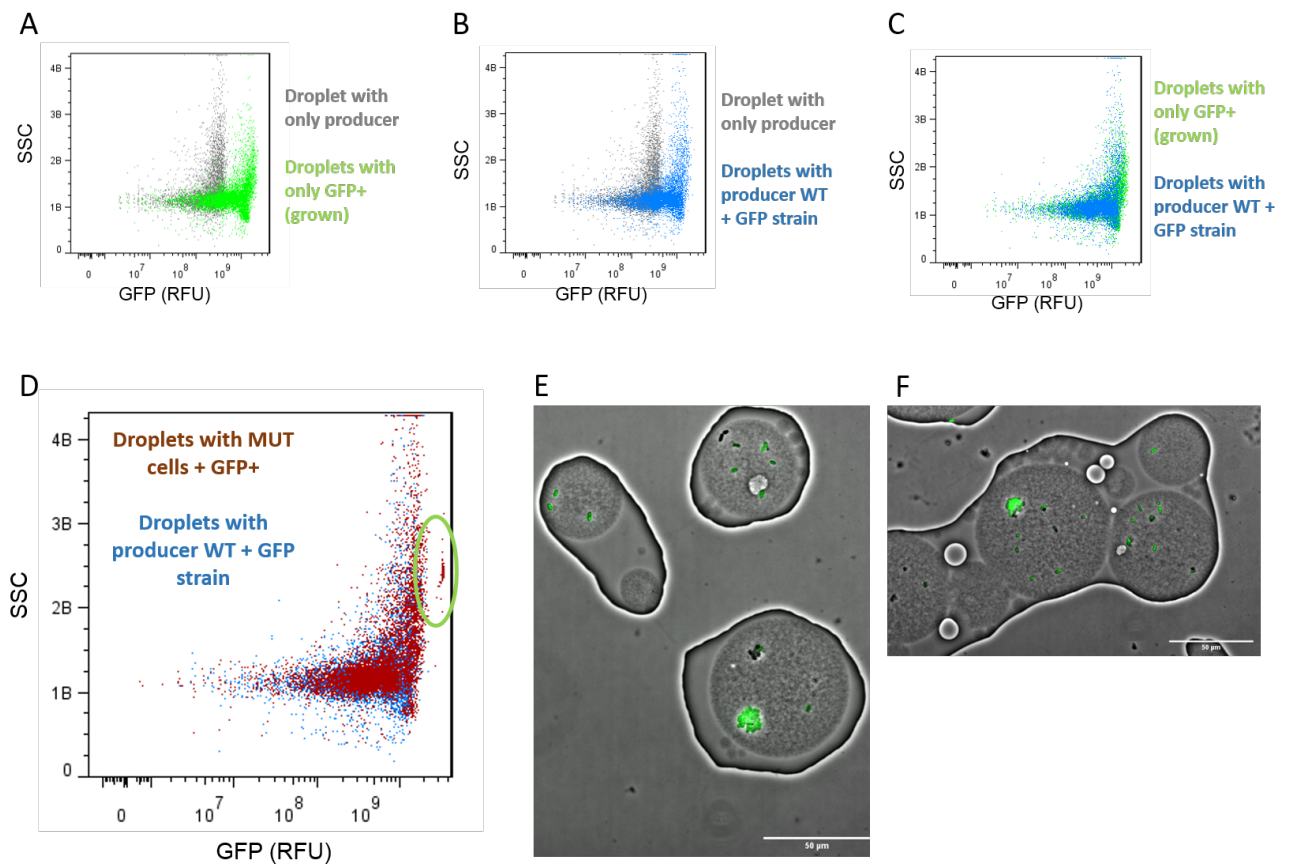

**Fig. S8. Sorting of agarose-based droplets containing potential amino acid overproducer cells.** (A) Droplets containing control samples, droplets with only GFPsensor cells grown in CDM+aa (green), and droplets with only producer cells (IPLA838 WT, in grey). (B) Droplets containing control samples, droplets with producer-GFPsensor (1:10 ratio) cells grown in CDM-casein (blue), and droplets with only producer cells (IPLA838 WT, in grey). (C) Droplets containing control samples, only GFPsensor cells grown in CDM+aa (green), and droplets with producer-GFPsensor (1:10 ratio) cells grown in CDM-casein (blue). (D) Droplets containing producer WT-GFPsensor (1:10 ratio) cells grown in CDM-casein (blue), and droplets with mutagenized producer-GFPsensor (1:10 ratio) cells grown in CDM-casein (dark red). The sorted droplets are indicated in a green circle. (E, F) Snapshots of droplets illustrating the different possible scenarios: empty droplets, droplets with only sensor, and droplets with producer-sensor.

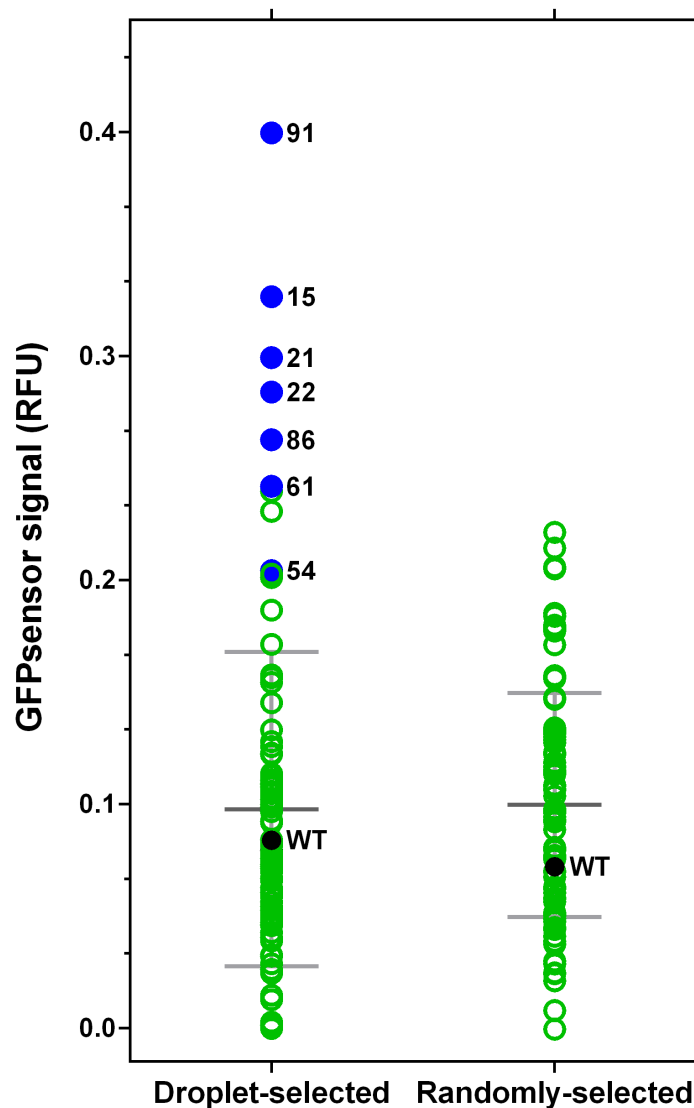

**Fig. S9. Comparison between droplet- and randomly- selection screenings of overproducer strains.** The sample in the left side of this plot shows the screening for amino acid secretion performed by droplet-selection (as shown in Fig. 3B) by 103 MUT strains by co-cultivation with the GFPsensor. The GFPsensor fluorescence signal (y-axis) when it is co-cultivated with each MUT strain is shown. The wild-type strain (WT) is indicated (black dot), and strains that highly promote the growth of the GFPsensor are highlighted (blue dots). The sample in the right side of this plot shows the screening of 100 randomly selected MUT strains, without droplet selection.

**Table S1. Strains and plasmids used in this study**

| Strain                  | Description                                                                                                                                                                                    | Reference                                     |
|-------------------------|------------------------------------------------------------------------------------------------------------------------------------------------------------------------------------------------|-----------------------------------------------|
| <b><i>L. lactis</i></b> |                                                                                                                                                                                                |                                               |
| MG1363                  | Opp <sup>+</sup> , DtpT <sup>+</sup> , Dpp <sup>+</sup> , Lac <sup>-</sup> , Prt <sup>-</sup> ; <i>L. lactis</i> subsp. <i>cremoris</i> , plasmid-free NCDO712.                                | (Gasson, 1983)                                |
| AG500                   | Opp <sup>-</sup> , DtpT <sup>-</sup> , Dpp <sup>+</sup> ; MG1363 $\Delta pepO$ , $\Delta dtpT$ , $\Delta opp$ .                                                                                | (Hagting et al., 1994; Kunji et al., 1995)    |
| YS5A                    | Opp <sup>-</sup> , DtpT <sup>-</sup> , Dpp <sup>-</sup> , Ery <sup>r</sup> ; AG500 <i>dppA</i> ::pINT <i>dppA</i> .                                                                            | (Sanz et al., 2001)                           |
| GFPsensor               | Lac <sup>-</sup> , Prt <sup>-</sup> , Ery <sup>r</sup> , AG500 derivative, carrying the vector pSEUDO::P <sub>usp45</sub> - <i>sfgfp</i> (Bs).                                                 | This work                                     |
| NZ9000pLP712            | Lac <sup>+</sup> , Prt <sup>+</sup> , <i>L. lactis</i> subsp. <i>cremoris</i> NZ9000 carrying the conjugative plasmid of NCDO712 containing the <i>lac</i> and <i>prtP/prtM</i> genes.         | MolGen collection                             |
| MG610                   | Ery <sup>r</sup> , PrtP <sup>+</sup> , MG1363 derivative, carrying two to three copies of vector pKLG610 containing the <i>prtP/prtM</i> genes of <i>L. lactis</i> subsp. <i>cremoris</i> Wg2. | (Leenhouts et al., 1991)                      |
| MG1363pGKV552           | Ery <sup>r</sup> , Lac <sup>-</sup> , PrtP <sup>+</sup> ; MG1363 carrying the plasmid pGKV552 that contains the <i>prtP/prtM</i> genes of <i>L. lactis</i> subsp. <i>cremoris</i> Wg2.         | (Leenhouts et al., 1991)                      |
| NCDO712                 | Lac <sup>+</sup> , PrtP <sup>+</sup> , <i>L. lactis</i> subsp. <i>cremoris</i>                                                                                                                 | (Gasson, 1983)                                |
| SK11                    | Lac <sup>+</sup> , PrtP <sup>+</sup> , <i>L. lactis</i> subsp. <i>cremoris</i>                                                                                                                 | (Siezen et al., 2005)                         |
| Wg2                     | PrtP <sup>+</sup> , <i>L. lactis</i> subsp. <i>cremoris</i>                                                                                                                                    | (Haandrikman et al., 1990; Otto et al., 1982) |
| AM1                     | PrtP <sup>+</sup> , <i>L. lactis</i> subsp. <i>cremoris</i>                                                                                                                                    | (Exterkate and De Veer, 1989)                 |
| RR2                     | Lac <sup>+</sup> , PrtP <sup>+</sup> , <i>L. lactis</i> subsp. <i>lactis</i> biovar. diacetylactis                                                                                             | MolGen collection                             |
| WW4                     | Lac <sup>+</sup> , PrtP <sup>+</sup> , <i>L. lactis</i> subsp. <i>lactis</i> biovar. diacetylactis                                                                                             | MolGen collection                             |
| M18                     | Lac <sup>+</sup> , PrtP <sup>+</sup> , <i>L. lactis</i> subsp. <i>lactis</i> biovar. diacetylactis                                                                                             | MolGen collection                             |
| CNRZ190                 | Lac <sup>+</sup> , PrtP <sup>+</sup> , <i>L. lactis</i> subsp. <i>lactis</i> biovar. diacetylactis                                                                                             | (Obis et al., 2001)                           |
| 1816S                   | Lac <sup>+</sup> , PrtP <sup>+</sup> , <i>L. lactis</i> subsp. <i>lactis</i> biovar. diacetylactis                                                                                             | (Hill et al., 1985)                           |

|                                                          |                                                                                                                                                                                    |                                    |
|----------------------------------------------------------|------------------------------------------------------------------------------------------------------------------------------------------------------------------------------------|------------------------------------|
| CRL264                                                   | Lac <sup>+</sup> , PrtP+, <i>L. lactis</i> subsp. <i>lactis</i> biovar. diacetylactis                                                                                              | (García-Quintáns et al., 2008)     |
| C17                                                      | Lac <sup>+</sup> , PrtP+, <i>L. lactis</i> subsp. <i>lactis</i> biovar. diacetylactis                                                                                              | (Hugenholtz and Starrenburg, 1992) |
| NCDO176                                                  | Lac <sup>+</sup> , PrtP+, <i>L. lactis</i> subsp. <i>lactis</i> biovar. diacetylactis                                                                                              | MolGen collection                  |
| IPLA838                                                  | Lac <sup>+</sup> , PrtP+, <i>L. lactis</i> subsp. <i>lactis</i> biovar. diacetylactis                                                                                              | (Cárcoba et al., 2000)             |
| MR3                                                      | Lac <sup>+</sup> , PrtP+, <i>L. lactis</i> subsp. <i>lactis</i> biovar. diacetylactis                                                                                              | (Monnet et al., 2000)              |
| <b><i>E. coli</i></b>                                    |                                                                                                                                                                                    |                                    |
| DH5α                                                     | F <sup>-</sup> φ80 <i>lacZ</i> ΔM15 Δ( <i>lacZYA-argF</i> )U169 <i>recA1 endA1 hsdR17</i> (rK <sup>-</sup> , mK <sup>+</sup> ) <i>phoA supE44 λ<sup>-</sup> thi-1 gyrA96 relA1</i> | Laboratory stock                   |
| <b>Plasmids</b>                                          | <b>Description</b>                                                                                                                                                                 | <b>Reference</b>                   |
| pSEUDO::P <sub>usp45<sup>-</sup></sub> <i>sfgfp</i> (Bs) | Ery <sup>r</sup> , integration vector, pSEUDO::P <sub>usp45<sup>-</sup></sub> <i>sfgfp</i> (Bs) derivative, carrying the gene coding for the green fluorescent protein (sfGFP).    | (Overkamp et al., 2013)            |

**Table S2. Oligonucleotides used in this study**

| <b>Name</b>  | <b>Sequence</b>                 |
|--------------|---------------------------------|
| TestPrnP_Fw1 | 5' ACTTATAGTCCTGCTGGTGGTAATT 3' |
| TestPrnP_Rv1 | 5' CTCATTAATTGCAGTTTTAACGCTC 3' |

**Table S3. Identified mutations in the genomic DNA sequences of three MUT cells.**

| MUT cell      | Mutation               | Gene                 | Annotation                                                     |
|---------------|------------------------|----------------------|----------------------------------------------------------------|
| <b>MUT-91</b> | Q57L (CAA→CTA)         | <i>IPLA838_01463</i> | Hypothetical protein                                           |
|               | N2K (AAC→AAA)          | <i>oppA</i>          | Oligopeptide-binding protein                                   |
|               | (TGT→A*T) (intergenic) | <i>PoppA</i>         | Promoter Oligopeptide-binding protein                          |
|               | V87L (GTT→CTT)         | <i>IPLA838_02283</i> | Hypothetical protein                                           |
|               | F508S (TTT→TCT)        | <i>IPLA838_00548</i> | peptidase                                                      |
|               | E504G (GAA→GGA)        | <i>IPLA838_00548</i> | peptidase                                                      |
|               | C21Y (TGT→TAT)         | <i>IPLA838_00550</i> | Hypothetical protein                                           |
|               | F28L (TTT→CTT)         | <i>IPLA838_00937</i> | Hypothetical protein                                           |
|               | A22V (GCT→GTT)         | <i>ftsA</i>          | Cell division protein                                          |
|               | D14E (GAT→GAA)         | <i>IPLA838_02003</i> | Hypothetical protein                                           |
|               | H266L (CAT→TAT)        | <i>purL</i>          | Phosphoribosyl-formyl-glycinamide synthase subunit             |
|               | A51V (GCT→GTT)         | <i>menH_1</i>        | 2-succinyl-6-hydroxy-2,4-cyclohexadiene-1-carboxylate synthase |
|               | E155K (GAA→AAA)        | <i>IPLA838_02454</i> | Hypothetical protein                                           |
|               | Q76* (CAA→TAA)         | <i>IPLA838_00812</i> | Putative endopeptidase                                         |
| <b>MUT-15</b> | Q57L (CAA→CTA)         | <i>IPLA838_01463</i> | Hypothetical protein                                           |
|               | N2K (AAC→AAA)          | <i>oppA</i>          | Oligopeptide-binding protein                                   |
|               | (TGT→A*T) (intergenic) | <i>PoppA</i>         | Promoter Oligopeptide-binding protein                          |
|               | V87L (GTT→CTT)         | <i>IPLA838_02283</i> | Hypothetical protein                                           |
|               | F508S (TTT→TCT)        | <i>IPLA838_00548</i> | peptidase                                                      |
|               | E504G (GAA→GGA)        | <i>IPLA838_00548</i> | peptidase                                                      |
|               | C21Y (TGT→TAT)         | <i>IPLA838_00550</i> | Hypothetical protein                                           |
|               | F28L (TTT→CTT)         | <i>IPLA838_00937</i> | Hypothetical protein                                           |
| <b>MUT-21</b> | Q57L (CAA→CTA)         | <i>IPLA838_01463</i> | Hypothetical protein                                           |
|               | N2K (AAC→AAA)          | <i>oppA</i>          | Oligopeptide-binding protein                                   |
|               | (TGT→A*T) (intergenic) | <i>PoppA</i>         | Promoter Oligopeptide-binding protein                          |
|               | V87L (GTT→CTT)         | <i>IPLA838_02283</i> | Hypothetical protein                                           |
|               | F508S (TTT→TCT)        | <i>IPLA838_00548</i> | peptidase                                                      |
|               | E504G (GAA→GGA)        | <i>IPLA838_00548</i> | peptidase                                                      |
|               | C21Y (TGT→TAT)         | <i>IPLA838_00550</i> | Hypothetical protein                                           |
|               | F28L (TTT→CTT)         | <i>IPLA838_00937</i> | Hypothetical protein                                           |

The mutations highlighted in light orange color are shown in Fig. 5 as common mutations between the *L. lactis* MUT strains. These mutations are related to the lactococcal peptide uptake systems.

**Table S4. Determination of proteinase type based on the amino acid residues of the PrtP protein.**

| <b>PrtP residue</b> | <b>NCDO176</b>     | <b>WW4</b>         | <b>CRL264</b>      | <b>SK11</b>     | <b>Wg2</b>    |
|---------------------|--------------------|--------------------|--------------------|-----------------|---------------|
| 131                 | Thr                | Thr                | Thr                | Thr             | Thr           |
| 138                 | Thr                | Thr                | Thr                | Thr             | Thr           |
| 142                 | Ala                | Ala                | Ala                | Ala             | Ser           |
| 144                 | Leu                | Leu                | Leu                | Leu             | Leu           |
| 166                 | Asp                | Asp                | Asp                | Asp             | Asp           |
| 177                 | Leu                | Ile                | Ile                | Leu             | Leu           |
| 747                 | Leu                | Leu                | Leu                | Arg             | Leu           |
| 748                 | Thr                | Thr                | Thr                | Lys             | Thr           |
| 763                 | His                | His                | His                | Asn             | Asn           |
| <b>PrtP type</b>    | <b>f (PI/PIII)</b> | <b>f (PI/PIII)</b> | <b>f (PI/PIII)</b> | <b>b (PIII)</b> | <b>e (PI)</b> |

**Table S5. Proteinase (PrtP) types of positive- and negative-amino acid producing strains.**

| Strain        | Subspecies      | PrtP type | Amino acid secretion |
|---------------|-----------------|-----------|----------------------|
| Wg2           | <i>cremoris</i> | I         | +                    |
| WW4           | <i>lactis</i>   | V/III     | +                    |
| NCDO176       | <i>lactis</i>   | V/III     | +                    |
| MG1363pNZ521  | <i>cremoris</i> | III       | -                    |
| MG1363pGKV552 | <i>cremoris</i> | I         | -                    |
| CRL264        | <i>lactis</i>   | V/III     | -                    |
| SK11          | <i>cremoris</i> | III       | -                    |



**Table S6. Contents of essential amino acids in culture supernatants of MUT strains.**

| Sample     |   | Glu        | His       | Val        | Met       | Ile       | Leu        |
|------------|---|------------|-----------|------------|-----------|-----------|------------|
| CDM-casein | B | ND         | ND        | ND         | ND        | ND        | ND         |
| WT         | A | 1.3 ± 0.2  | 3.0 ± 0.2 | ND         | ND        | ND        | ND         |
|            | B | 4.4 ± 0.1  | 3.0 ± 0.2 | 2.3 ± 0.1  | ND        | ND        | ND         |
| 91         | A | 21.6 ± 0.7 | 5.9 ± 0.7 | 7.3 ± 0.4  | ND        | ND        | 7.5 ± 0.1  |
|            | B | 47.5 ± 0.7 | 6.5 ± 0.4 | 23.8 ± 0.1 | ND        | 2.5 ± 0.1 | 30.6 ± 0.7 |
| 15         | A | 19.1 ± 0.2 | 5.4 ± 0.3 | 4.6 ± 0.2  | ND        | ND        | 3.4 ± 0.2  |
|            | B | 49.8 ± 0.3 | 6.8 ± 0.2 | 21.6 ± 0.2 | ND        | 2.1 ± 0.1 | 21.6 ± 0.1 |
| 21         | A | 17.8 ± 0.3 | 6.1 ± 0.3 | 3.4 ± 0.4  | ND        | ND        | 3.9 ± 0.3  |
|            | B | 38.6 ± 0.8 | 6.8 ± 0.3 | 18.3 ± 0.4 | ND        | ND        | 21.4 ± 0.7 |
| 22         | A | 14.3 ± 0.3 | 5.9 ± 0.2 | 1.4 ± 0.1  | ND        | ND        | 2.6 ± 0.4  |
|            | B | 30.2 ± 0.3 | 7.0 ± 0.3 | 13.1 ± 0.2 | ND        | ND        | 14.7 ± 0.2 |
| 86         | A | 17.3 ± 0.2 | 6.0 ± 0.1 | 3.4 ± 0.2  | ND        | ND        | 4.1 ± 0.6  |
|            | B | 42.7 ± 0.7 | 6.6 ± 0.2 | 19.1 ± 0.4 | ND        | 1.9 ± 0.6 | 23.1 ± 0.2 |
| 61         | A | 13.3 ± 0.1 | 5.6 ± 0.2 | 1.3 ± 0.2  | ND        | ND        | 2.5 ± 0.1  |
|            | B | 36.1 ± 0.2 | 6.1 ± 0.3 | 14.4 ± 0.3 | ND        | 1.4 ± 0.2 | 16.6 ± 0.4 |
| 54         | A | 14.5 ± 0.2 | 6.1 ± 0.2 | 2.8 ± 0.2  | 1.3 ± 0.2 | ND        | 2.6 ± 0.1  |
|            | B | 33.8 ± 0.3 | 5.8 ± 0.2 | 16.0 ± 2.2 | 1.4 ± 0.1 | 1.2 ± 0.1 | 16.1 ± 0.1 |

Values indicate concentration ( $\mu\text{M}$ ). Two sampling points are shown: A- end of lag growth phase, and B- mid exponential growth phase (see Fig. S4). After the strains were grown in CDM-casein medium, the concentrations of amino acids in the culture supernatants were measured using a HPLC assay coupled with fluorescence detection. The wildtype strain is shown in grey. All mutants are shown in blue. A negative (CDM-casein) control is shown in light grey. Amino acids below the detection limit of the HPLC assay are indicated as ND. Quantifications were performed in duplicates, and average values are shown. Error is shown as SD.

## Supplementary References

- Cárcoba, R., Delgado, T., Rodríguez, A., 2000. Comparative performance of a mixed strain starter in cow's milk, ewe's milk and mixtures of these milks. *Eur. Food Res. Technol.* <https://doi.org/10.1007/s002170000157>
- Doeven, M.K., Kok, J., Poolman, B., 2005. Specificity and selectivity determinants of peptide transport in *Lactococcus lactis* and other microorganisms. *Mol. Microbiol.* <https://doi.org/10.1111/j.1365-2958.2005.04698.x>
- Exterkate, F.A., De Veer, G.J.C.M., 1989. Characterization of the Cell Wall Proteinase PIII of *Lactococcus lactis* subsp. *cremoris* strain AM1, and its Relationship with the Catalytically Different Cell Wall Proteinase PI/PII of Strain HP. *Syst. Appl. Microbiol.* [https://doi.org/10.1016/S0723-2020\(89\)80048-7](https://doi.org/10.1016/S0723-2020(89)80048-7)
- García-Quintáns, N., Repizo, G., Martín, M., Magni, C., López, P., 2008. Activation of the diacetyl/acetoin pathway in *Lactococcus lactis* subsp. *lactis* bv. *diacetylactis* CRL264 by acidic growth. *Appl. Environ. Microbiol.* <https://doi.org/10.1128/AEM.01851-07>
- Gasson, M.J., 1983. Plasmid complements of *Streptococcus lactis* NCDO 712 and other lactic streptococci after protoplast-induced curing. *J. Bacteriol.*
- Haandrikman, A.J., Van Leeuwen, C., Kok, J., Vos, P., De Vos, W.M., Venema, G., 1990. Insertion elements of lactococcal proteinase plasmids. *Appl. Environ. Microbiol.*
- Hagting, A., Kunji, E.R.S., Leenhouts, K.J., Poolman, B., Konings, W.N., 1994. The Di- and tripeptide transport protein of *Lactococcus lactis*. A new type of bacterial peptide transporter. *J. Biol. Chem.*
- Hill, C., Daly, C., Fitzgerald, G.F., 1985. Conjugative transfer of the transposon Tn919 to lactic acid bacteria. *FEMS Microbiol. Lett.* <https://doi.org/10.1111/j.1574-6968.1985.tb00996.x>
- Hugenholtz, J., Starrenburg, M.J.C., 1992. Diacetyl production by different strains of *Lactococcus lactis* subsp. *lactis* var. *diacetylactis* and *Leuconostoc* spp. *Appl. Microbiol. Biotechnol.* <https://doi.org/10.1007/BF00169412>
- Kunji, E.R.S., Hagting, A., De Vries, C.J., Juillard, V., Haandrikman, A.J., Poolman, B., Konings, W.N., 1995. Transport of  $\beta$ -casein-derived peptides by the oligopeptide transport system is a crucial step in the proteolytic pathway of *Lactococcus lactis*. *J. Biol. Chem.* <https://doi.org/10.1074/jbc.270.4.1569>

- Leenhouts, K.J., Gietema, J., Kok, J., Venema, G., 1991. Chromosomal stabilization of the proteinase genes in *Lactococcus lactis*. *Appl. Environ. Microbiol.*
- Monnet, C., Aymes, F., Corrieu, G., 2000. Diacetyl and alpha-acetolactate overproduction by *Lactococcus lactis* subsp. *lactis* biovar diacetyllactis mutants that are deficient in alpha-acetolactate decarboxylase and have a low lactate dehydrogenase activity. *Appl. Environ. Microbiol.* 66, 5518–20. <https://doi.org/10.1128/AEM.66.12.5518-5520.2000>
- Obis, D., Guillot, A., Mistou, M.Y., 2001. Tolerance to high osmolality of *Lactococcus lactis* subsp. *lactis* and *cremoris* is related to the activity of a betaine transport system. *FEMS Microbiol. Lett.* [https://doi.org/10.1016/S0378-1097\(01\)00293-2](https://doi.org/10.1016/S0378-1097(01)00293-2)
- Otto, R., De Vos, W.M., Gavrieli, J., 1982. Plasmid DNA in *Streptococcus cremoris* Wg2: Influence of pH on selection in chemostats of a variant lacking a protease plasmid. *Appl. Environ. Microbiol.*
- Overkamp, W., Beilharz, K., Weme, R.D.O., Solopova, A., Karsens, H., Kovács, Á.T., Kok, J., Kuipers, O.P., Veening, J.W., 2013. Benchmarking various green fluorescent protein variants in *Bacillus subtilis*, *Streptococcus pneumoniae*, and *Lactococcus lactis* for live cell imaging. *Appl. Environ. Microbiol.* 79, 6481–6490. <https://doi.org/10.1128/AEM.02033-13>
- Sanz, Y., Lanfermeijer, F.C., Renault, P., Bolotin, A., Konings, W.N., Poolman, B., 2001. Genetic and functional characterization of dpp genes encoding a dipeptide transport system in *Lactococcus lactis*. *Arch. Microbiol.* <https://doi.org/10.1007/s002030100270>
- Siezen, R.J., Renckens, B., Van Swam, I., Peters, S., Van Kranenburg, R., Kleerebezem, M., De Vos, W.M., 2005. Complete sequences of four plasmids of *Lactococcus lactis* subsp. *cremoris* SK11 reveal extensive adaptation to the dairy environment. *Appl. Environ. Microbiol.* <https://doi.org/10.1128/AEM.71.12.8371-8382.2005>
